1 **Molecular design, optimization and genomic integration of chimeric B cell**  
2 **receptors in murine B cells**

3  
4 Theresa Pesch<sup>1</sup>, Lucia Bonati<sup>1</sup>, William Kelton<sup>1</sup>, Cristina Parola<sup>1,2</sup>, Roy A Ehling<sup>1</sup>, Lucia  
5 Csepregi<sup>1</sup>, Daisuke Kitamura<sup>3</sup>, Sai T Reddy<sup>1,\*</sup>

6  
7 <sup>1</sup> *Department of Biosystems Science and Engineering, ETH Zürich, Basel 4058, Switzerland*

8 <sup>2</sup> *Life Science Graduate School, Systems Biology, ETH Zürich, University of Zurich, Zurich 8057,*  
9 *Switzerland*

10 <sup>3</sup> *Research Institute for Biomedical Sciences, Tokyo University of Science, Noda, Japan*

11 \*To whom correspondence should be addressed. Tel: +41 61 387 33 68; Email: [sai.reddy@ethz.ch](mailto:sai.reddy@ethz.ch)

12 Key words: B cells, synthetic antigen receptor, cellular engineering, genome editing, cellular  
13 immunotherapy, CRISPR-Cas9

14  
15 **Abstract**

16 Immune cell therapies based on the integration of synthetic antigen receptors provide  
17 a powerful strategy for the treatment of diverse diseases, most notably retargeting  
18 T cells engineered to express chimeric antigen receptors (CAR) for cancer therapy. In  
19 addition to T lymphocytes, B lymphocytes may also represent valuable immune cells  
20 that can be engineered for therapeutic purposes such as protein replacement therapy  
21 or recombinant antibody production. In this article, we report a promising concept for  
22 the molecular design, optimization and genomic integration of a novel class of  
23 synthetic antigen receptors, chimeric B cell receptors (CBCR). We initially optimized  
24 CBCR expression and detection by modifying the extracellular surface tag, the  
25 transmembrane regions and intracellular signaling domains. For this purpose, we  
26 stably integrated a series of CBCR variants into immortalized B cell hybridomas using  
27 CRISPR-Cas9. Subsequently, we developed a reliable and consistent pipeline to  
28 precisely introduce cassettes of several kilobases size into the genome of primary  
29 murine B cells, again via CRISPR-Cas9 induced HDR. Finally, we were able to show  
30 the robust surface expression and antigen recognition of a synthetic CBCR in primary  
31 B cells. We anticipate that CBCRs and our approach for engineering primary B cells  
32 will be a valuable tool for the advancement of future B cell-based immune therapies.

33

## 34 Introduction

35 The successful clinical results of genetically modified T cells for cancer  
36 immunotherapy have shown the great potential for engineering immune cells for  
37 cellular medicine<sup>1,2,3,4</sup>. Engineered CD8<sup>+</sup> T cells have shown the most progress as they  
38 can execute cytotoxic functions by inducing target cells to undergo programmed cell  
39 death<sup>5</sup>, thus providing a means to directly attack cancer cells. The strategy to take  
40 advantage of the natural features of immune cells, while re-directing their specificity  
41 by receptor engineering has culminated in the concept of chimeric antigen receptor  
42 (CAR) T cells<sup>6,7,8</sup>. A CAR is a recombinant antigen receptor composed of an  
43 extracellular antigen-binding domain, typically an antibody fragment (e.g., a single-  
44 chain variable fragment [scFv]), linked by a spacer peptide to a transmembrane  
45 domain, which is further fused to an intracellular T cell activation domain, such as  
46 CD3 $\zeta$ <sup>9,10,11</sup>. A broad range of extracellular binding domains and intracellular  
47 costimulatory domains (e.g., CD28 and 4-1BB) have been incorporated into CARs to  
48 further enhance their targeting and signaling properties<sup>12,13,14,15,16</sup>. CAR T cell  
49 therapies rely on the isolation, the *ex vivo* expansion and engineering of T lymphocytes  
50 by the introduction of CARs followed by the re-infusion into the patient. While the  
51 engineering and development of T cells as cellular therapeutics is advancing rapidly,  
52 B lymphocytes represent another class of immune cells that hold promise of being  
53 powerful vehicles for adoptive cell therapy due to their involvement in essential  
54 processes of immunological recognition and protection. Considering the similarity in  
55 the principle of clonal selection and expansion upon antigen exposure, it might be  
56 possible to take advantage of natural features of B cells for therapeutic purposes. For  
57 example, B cells have very interesting innate properties, such as their ability to  
58 differentiate, following antigen-specific activation, into long-lived antibody secreting  
59 plasma cells, which home to and reside in specific bone marrow niches, reportedly for  
60 decades<sup>17,18</sup>. Their longevity, paired with the capability to secrete large quantities of  
61 protein, make primary B cells unique and promising targets as cellular hosts for  
62 therapeutic protein production<sup>19</sup>.

63

64 Primary T cells can be genetically modified (via lentiviral or retroviral integration) and  
65 expanded *in vitro* relatively easily; in contrast, progress on the engineering of B cells  
66 has been severely compromised by technical challenges in their *in vitro* culture,

67 expansion and genetic modification. This may be the reason why B cells have received  
68 relatively little attention as cellular engineering hosts in immunotherapy. While high  
69 rates of transduction in B cells can be obtained using recombinant adenovirus or  
70 Epstein-Barr virus vectors, this only results in the temporary expression of transgenes  
71 in episomal vectors<sup>20,21</sup>. In contrast, retroviral and lentiviral vectors allow long-term  
72 transgene expression by random integration into the host genome. However, these  
73 vectors tend to be inefficient at transducing primary B cells<sup>22,23</sup>. Despite the hurdles,  
74 there have been a few examples of successful reprogramming of primary B cells:  
75 genetically modified B cell have been used for presentation of recombinant antigen for  
76 inhibition of immunity in a mouse model of multiple sclerosis<sup>24</sup> or induction of tolerance  
77 towards therapeutic proteins<sup>25</sup>. The revolutionary advances in targeted genome  
78 editing have paved the way for alternative strategies to genetically modify immune  
79 cells<sup>26,27,28</sup>. So far, the CRISPR-Cas9 system has been mainly applied to integrate  
80 transgenes into lymphoma-derived or hybridoma cell lines by homology-directed  
81 repair (HDR)<sup>29,30,31</sup>. Precise genome editing in primary murine B cells derived from  
82 murine transgenic models endogenously expressing Cas9 protein showed efficient  
83 gene disruption through on non-homologous end-joining (NHEJ) repair<sup>32</sup>. Furthermore,  
84 a few recent studies used CRISPR-Cas9 for site-specific gene disruption or transgene  
85 integration by HDR in human primary B cells<sup>19,33,34</sup>. Hung *et al.* demonstrated that  
86 delivery of Cas9 ribonucleoprotein (RNP) complexes in combination with HDR DNA  
87 templates enabled the engineering of plasma cells to secrete therapeutic proteins.  
88 This highlights the attractive prospect of establishing a controllable system in which  
89 exposure to antigen can induce engineered B cells that produce therapeutic proteins.  
90  
91 Establishing a preclinical genome editing platform based on primary murine B cells  
92 enables the investigation of these cells as novel vehicle for adoptive immune cell  
93 therapies. In the present study, we have molecularly designed and optimized a novel  
94 class of synthetic antigen receptors, chimeric B cell receptors (CBCR), which were  
95 stably integrated by CRISPR-Cas9 into immortalized and primary murine B cells. First,  
96 we assessed the stable expression of a broad range of constructs encoding a model  
97 antigen-specific CBCR linked to a green fluorescent protein (GFP) reporter in a B cell  
98 hybridoma line. We genomically modified this cell line by targeting a safe harbor locus  
99 (*Rosa26*) with CRISPR-Cas9 RNP complexes and CBCR HDR templates in the form  
100 of linear dsDNA. We then optimized CBCR expression and detection by a series of

101 modifications to the extracellular surface tag, transmembrane domain and intracellular  
102 signaling domains. Based on the results obtained from construct screening in  
103 hybridoma cells, selected constructs displaying high levels of surface expression were  
104 further evaluated in murine primary B cells. Collectively, we could achieve the precise  
105 integration of CBCRs into the Rosa26 locus of primary murine B cells, its surface  
106 expression and selective enrichment of engineered cells. In the future, CBCR  
107 engineered B cells can be evaluated in preclinical *in vivo* models in order to assess  
108 their potential in versatile immune cell therapy applications.

109

## 110 **Results**

111

### 112 **Design of chimeric B cell receptors (CBCRs)**

113 In this study, we aimed to create a chimeric B cell receptor that is able to recognize  
114 antigen independently of the endogenously expressed B cell receptor. We initially  
115 used immortalized B cell hybridomas to screen a broad range of CBCR constructs  
116 encoding an antigen-binding domain, a spacer region that includes a detection tag, a  
117 transmembrane and cytoplasmic signaling domains (**Fig. 1a**). For each of these  
118 constructs we generated a stable cell line by CRISPR-Cas9 mediated integration of  
119 the transgene cassette into the safe harbor locus Rosa26, which has been validated  
120 to stably express robust levels of the transgenes, while minimizing proximity to proto-  
121 oncogenes and adverse effects on the host cell. Here, we used a parental hybridoma  
122 cell line which constitutively expresses Cas9 from the Rosa26 safe harbor locus  
123 approximately 6kb downstream of the CBCR integration site, as it permits the  
124 successful editing following transfection of only the pre-formed guide RNA (gRNA,  
125 crRNA:tracrRNA complex) and single-stranded oligonucleotide (ssODN) donors<sup>30</sup>.  
126 Additionally, this original cell line, that will be referred to as HC9-, contains a frameshift  
127 mutation in its endogenous antibody variable heavy chain region, which abrogates  
128 antibody expression and makes it a suitable host for the detection of surface-  
129 expressed CBCR.

130 Within the 5' portion of the Rosa26 locus, we identified several potential gRNA sites  
131 compatible with *S. Pyogenes* Cas9 and its protospacer adjacent motif (PAM, 5'-NGG).  
132 The activity of Cas9 at each gRNA site in B cells was evaluated by measuring non-  
133 homologous end-joining (NHEJ) via Surveyor nuclease assay (Supplementary  
134 **Fig. S1**)<sup>35</sup>. The gRNA with the highest activity (gRNA1) was selected for all

135 subsequent genome editing experiments (**Fig. 1b**). To precisely integrate the CBCR  
136 by Cas9-mediated HDR, donor templates were designed including the respective  
137 CBCR transgene flanked by homology arms of 1.4kb/1.5kb length complementary the  
138 Rosa26 sequences next to the gRNA1 target site (**Fig. 1c**). The PAM was not  
139 incorporated in the repair template, so that the repair template and the repaired  
140 sequence would not to be cleaved by Cas9. The full transgene consisted of a V<sub>κ</sub> leader  
141 sequence, a GFP reporter gene followed by a self-cleaving T2A sequence, and the  
142 CBCR all under the control of the cytomegalovirus (CMV) promoter<sup>36</sup>. The HDR donor  
143 was generated by PCR to obtain a linearized format and electroporated alongside the  
144 gRNA1 into the HC9- hybridoma cells. At ~72 h post-transfection, GFP<sup>+</sup> cells were  
145 isolated by fluorescence-activated cell sorting (FACS) and expanded in culture.

146

147 For the extracellular antigen-binding domain, we used scFvs, as these have been  
148 successfully used in previously engineered receptors such as CARs and synNotch<sup>10,37</sup>.  
149 Additionally, scFvs offer great stability and high-affinity ligand binding<sup>38</sup>. As a target,  
150 we selected the model protein hen egg lysozyme (HEL) due to its small size, easy  
151 availability and the presence of valuable research tools such as a HEL-specific B cell  
152 transgenic mouse model and well-described HEL-specific antibodies and scFvs<sup>39,40,41</sup>.  
153 Initially, we designed an scFv from the high-affinity antibody HyHEL10 in the V<sub>L</sub>-V<sub>H</sub>  
154 orientation. After comparison of this scFv to the affinity-improved M3 mutant scFv  
155 derived from the anti-HEL antibody D1.3, we proceeded with the M3 scFv in the V<sub>H</sub>-  
156 V<sub>L</sub> orientation due to increased detection signal by enzyme-linked immunoabsorbent  
157 assays (ELISA) (**Fig. S2**)<sup>42</sup>. CBCR expression can be detected by antigen labeling,  
158 however, this is often accompanied by B cell activation, therefore an orthogonal  
159 detection method would be valuable. While the GFP offers a selection marker for  
160 integration, it does not directly indicate surface expression of CBCR, thus the tactical  
161 introduction of a detection tag provides another identification marker. As has been  
162 previously shown with CARS in T cells, careful design of tag sequences and their  
163 location is required<sup>43,44,45</sup>. Initially the M3 scFv was equipped with an N-terminal Myc  
164 epitope (EQKLISEEDL) or fused to a C-terminal spacer sequence (26 amino acids  
165 [aa]) incorporating a Myc or Flag epitope (DYKDDDDK) (**Fig. 1d**). We used a secretion  
166 variant of the CBCR, which lacks the transmembrane and intracellular signaling  
167 domains to evaluate integration and secretion levels of HEL-binding scFv. We used  
168 enzyme-linked immunosorbent assays (ELISAs) on normalized culture supernatants.

169 Drastic improvement in scFv secretion was observed for cells in which the Flag  
 170 sequence was introduced into the C-terminal spacer as compared to both Myc epitope  
 171 containing variants (**Fig. 1e**), whereas equal RNA expression levels were confirmed  
 172 by RT-PCR (**Fig. 1f**) indicating impairment of either proper scFv protein folding or  
 173 secretion by the Myc epitope tag. RNA expression of C-terminally incorporated Flag  
 174 tag was significantly increased after enrichment for GFP<sup>+</sup> cells via FACS compared to  
 175 unsorted cells (**Fig. 1f**).  
 176

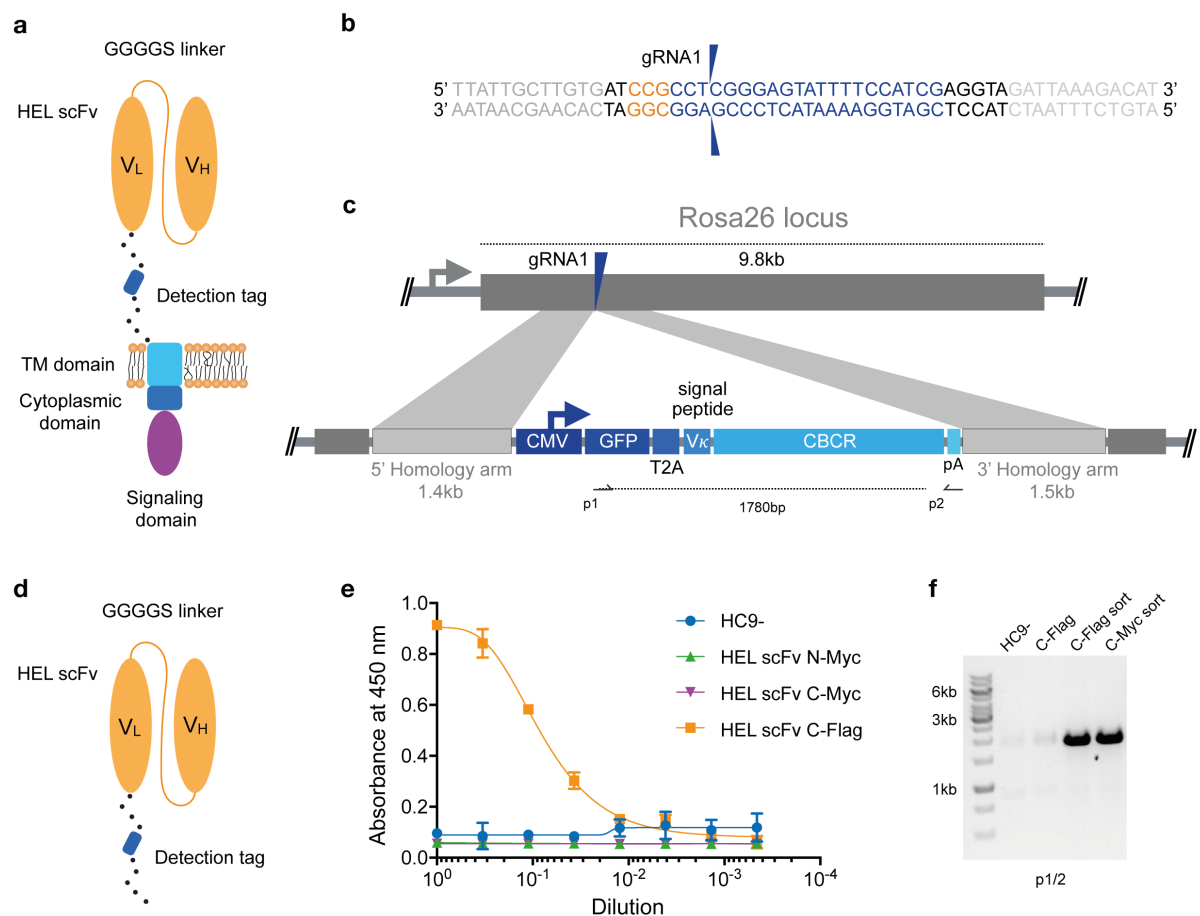

177  
 178 **Figure 1. Genomic integration of chimeric B cell receptors (CBCR) by CRISPR-Cas9-mediated**  
 179 **HDR.** a) Schematic shows the design of the CBCR, which consists of an scFv-based antigen recognition  
 180 domain (specific for a hen-egg lysozyme [HEL]) (orange), an extracellular spacer with a detection tag,  
 181 a transmembrane (TM) domain (light blue) and endodomains (blue, purple). scFV: single chain variable  
 182 fragment, VL: light chain variable domain. VH: heavy chain variable domain. b) Shown is the gRNA  
 183 sequence (blue) for Cas9-targeting of the safe-harbor locus Rosa26 locus; also shown is the  
 184 corresponding PAM sequence (orange) as well as the beginning of the homology arms in the HDR  
 185 template (light grey). The two blue arrows indicate the predicted Cas9 double-stranded break site.  
 186 c) CRISPR-Cas9-mediated HDR for genomic integration of CBCR construct into the Rosa26 locus. The  
 187 PCR-linearized donor template contains a GFP reporter gene followed by a T2A coding sequence, the

188  $V_{\kappa}$  signal peptide, the CBCR cassette and a polyA sequence under control of a CMV promoter and  
189 flanked by sequences homologous to the Rosa26 locus next to the gRNA target site of 1.4kb and 1.5kb,  
190 respectively (light purple). T2A: the self-cleaving thoseaasigna virus 2A sequence, pA: SV40 polyA  
191 sequence d) Schematic shows the CBCR antigen binding domain including a linker with a detection tag,  
192 either Myc or Flag epitope. e) Cells were enriched for GFP (488 nm) expression via FACS. Graph  
193 shows ELISA results of scFv secretion levels (capture HEL antigen, detection anti-Myc or Flag) on  
194 enriched hybridoma culture supernatant for scFv variants (excluding the TM and intracellular domains  
195 shown in d) with Myc or Flag detection tag in N- or C-terminal position. Supernatant of HC9- cells was  
196 used as negative control. For each sample, three technical replicates were analyzed and a four-  
197 parameter logistical curve was fitted to the data by nonlinear regression. Data are presented as the  
198 mean and error bars indicate standard deviation. f) RT-PCR on mRNA of scFv variants with C-terminal  
199 detection tags was performed with primers shown in c displaying expression of the transgenic scFv  
200 cassette after transfection only and transfection followed by sorting on GFP expression.

201

### 202 **Optimization of CBCR for robust surface expression on hybridoma B cells**

203 Next, we investigated whether a CBCR with the previously characterized scFv domain  
204 was presented at the cell surface, while maintaining antigen (HEL) binding. For this  
205 purpose, we linked the scFv clone M3 and the spacer incorporating the Flag epitope  
206 sequence to the transmembrane domain (TM) and the short cytoplasmic domain of  
207 the endogenous murine BCR (IgG2c) referred to as CBCR-BCR-TM. Alternatively, the  
208 spacer was fused to a CD28 transmembrane domain (CBCR-CD28-TM), which has  
209 been successfully incorporated in the design of several CARs<sup>46</sup> (**Fig. 2a**). When  
210 expressed in HC9- hybridoma cells, both CBCR-BCR-TM and CBCR-CD28-TM were  
211 detected on the cell surface based on HEL antigen binding for cells enriched for GFP  
212 by FACS (**Fig. 2b**, upper row). CBCR-CD28-TM was expressed at the cell surface to  
213 a substantially greater extent than CBCR-BCR-TM. Additionally, CBCR cells were  
214 stained with anti-Flag antibody. The CBCR surface expression was demonstrated by  
215 HEL antigen recognition in GFP<sup>+</sup> cells, but this did not correlate with the CBCR  
216 detection via the Flag peptide tag, suggesting impaired accessibility of the Flag epitope,  
217 once the spacer is fused to a transmembrane domain (**Fig. 2b**, lower row). However,  
218 we were able to identify clones demonstrating both a clear Flag tag expression and  
219 HEL antigen binding after performing single-cell sorting and expansion (**Fig. 2c**, right).  
220 While exhibiting a similar level of stable GFP expression (**Fig. 2c**, left), CBCR-CD28-  
221 TM surface expression was increased compared to CBCR-BCR-TM expression on the  
222 surface, consistent with the data obtained from bulk-sorted cells detected by HEL  
223 binding only (**Fig. 2b**). To evaluate stable and targeted integration of the CBCR

224 cassette on a genotypic level, PCR assays on genomic DNA were designed (**Fig. 2d**).  
 225 The introduced cassette was detected by end-point PCR in the single-cell line  
 226 expressing CBCR-BCR-TM, but not in the parental HC9- cell line (primers p3/4). PCR  
 227 analysis showed the presence of at least one residual wildtype allele in the cell line  
 228 (**Fig. 2e**). Genomic PCR using primers p5 and p6 confirmed precise integration of the  
 229 CBCR gene into the Rosa26 locus (**Fig. 2f**).

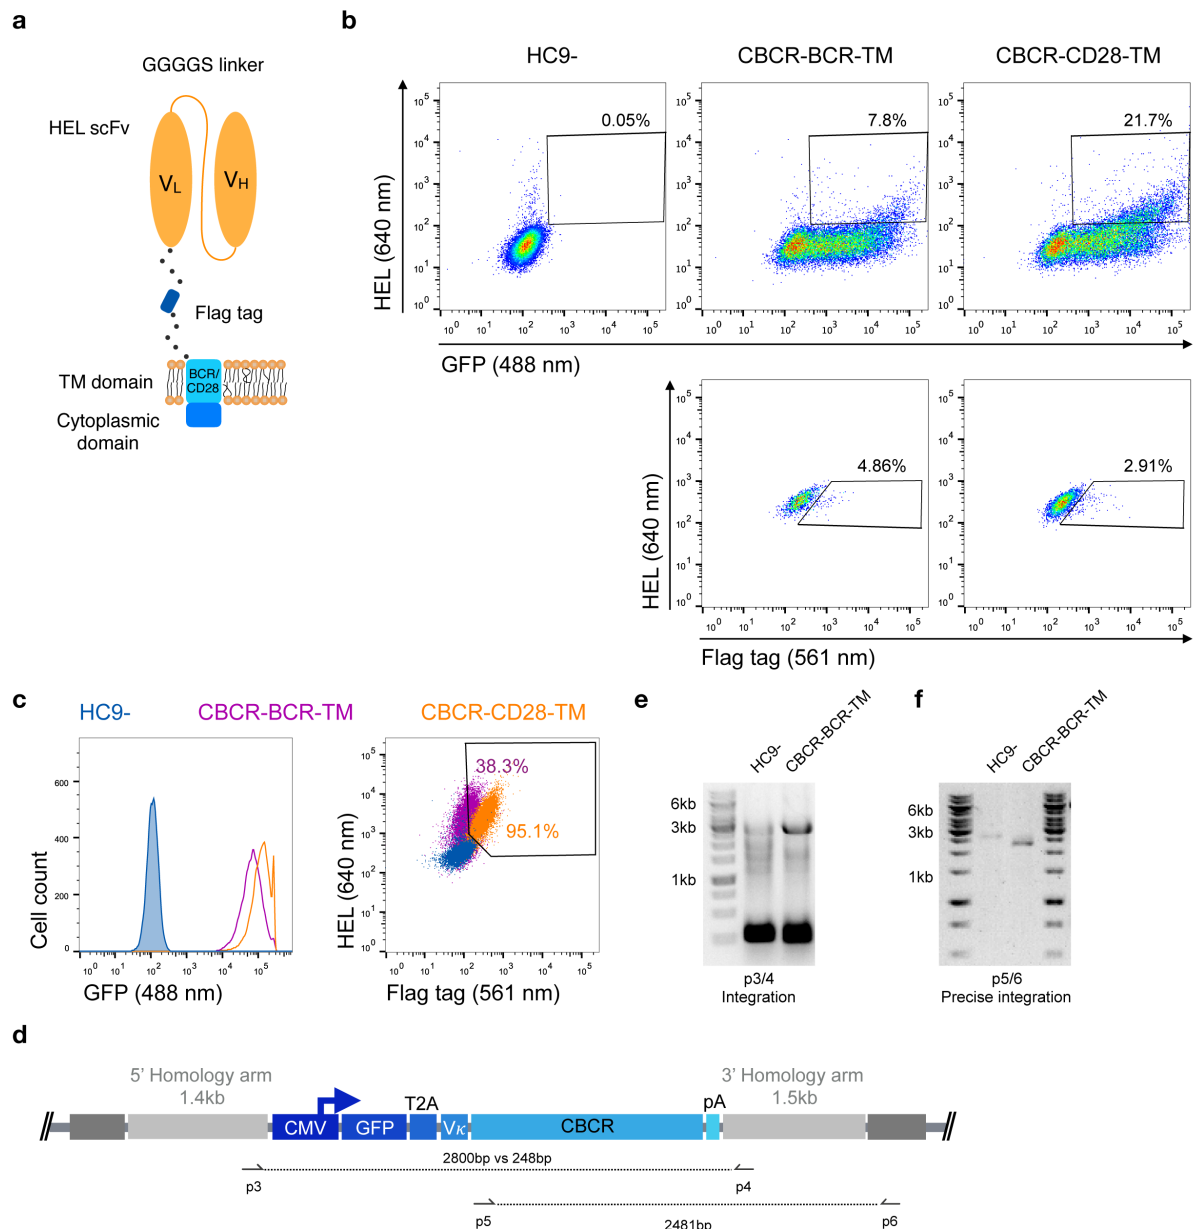

230  
 231 **Figure 2. Stable surface expression of CBCR on hybridoma cells.** a) Schematic of surface  
 232 expressed CBCR including a Flag detection tag and varying transmembrane (TM) domains. The TM  
 233 domain is derived from either the endogenous BCR composed of an immunoglobulin (purple in c) or  
 234 the T cell costimulatory CD28 molecule (orange in c). b) Representative flow cytometry dot plots of the  
 235 cells after enrichment based on GFP reveal CBCR surface expression (via HEL antigen binding) for



236 both variants (upper row), but no correlation with surface detection via the Flag protein tag (561 nm,  
237 lower row). The parental hybridoma cells were used as negative control. Cells that were positive for  
238 HEL binding and Flag tag expression were enriched by FACS. c) Flow cytometry analysis of resulting  
239 single-cell clones selected for GFP expression and binding to HEL shows comparable levels of  
240 persistent GFP expression for both construct variants (left), but differs in terms of CBCR surface  
241 expression (right). d) Schematic of primer sets for genomic DNA analysis in order to detect transgene  
242 integration (p3/4) and to confirm GFP-2A-CBCR cassette integration at the correct Rosa26 locus (p5/6).  
243 e) Agarose gel shows genomic PCR products that confirm the presence of the transgene in the cell line  
244 expressing the CBCR containing the BCR transmembrane (2800bp). Additionally, the presence of at  
245 least one wt allele is demonstrated by the PCR product with a length of 248bp. f) Genomic PCR analysis  
246 verifies the integration of the GFP-T2A-CBCR-BCR-TM cassette in the correct locus (2481bp) in the  
247 same cell line as in e. PCR products in e and f were verified by Sanger sequencing.

248

### 249 **Strep tag II incorporation improves CBCR surface expression and selection**

250 Previous studies have reported that the length of the non-signaling extracellular  
251 spacer can have an impact on surface expression or receptor activity<sup>37,45</sup>. We  
252 constructed variants with shorter and extended spacers in combination with both TM  
253 domains in order to analyze the influence on surface expression of the CBCR and the  
254 accessibility of the Flag detection tag within the spacer. HEL antigen binding within  
255 the GFP<sup>+</sup> population was examined for cells expressing CBCR including spacer  
256 regions of different lengths before and after sorting of GFP<sup>+</sup> cells (**Fig. 3a and b**).  
257 Antigen binding did not vary significantly with extracellular linker length, indicating that  
258 the composition of the spacer does not affect the surface expression in these cases.  
259 Detection of the Flag tag in GFP<sup>+</sup> bulk-sorted cells still was not improved after  
260 modifying the length of the spacer (**Fig. 3c**). To address the tag detection, we  
261 introduced one or more Strep tag II sequences replacing the Flag epitope within the  
262 Gly/Ser spacer (**Fig. 3d**). All Strep tag CBCR were stained with anti-Strep tag II  
263 antibody after enrichment of GFP<sup>+</sup> cells via FACS. Staining intensity was significantly  
264 increased for both CBCR-TM variants with one Strep tag II compared to the signal  
265 provided by the single Flag epitope (**Fig. 3e**). Surface expression based on antigen  
266 binding and tag detection again revealed increased level for CBCR-CD28-TM  
267 compared to the CBCR-BCR-TM variant. Further, staining intensity was dramatically  
268 enhanced for CBCR-CD28-TM cells that contained three Strep tag II sequences  
269 (**Fig. 3e**, right). This data indicate that inclusion of Strep tag II improves the CBCR  
270 surface expression and its correlation with staining based on the detection tag.

271

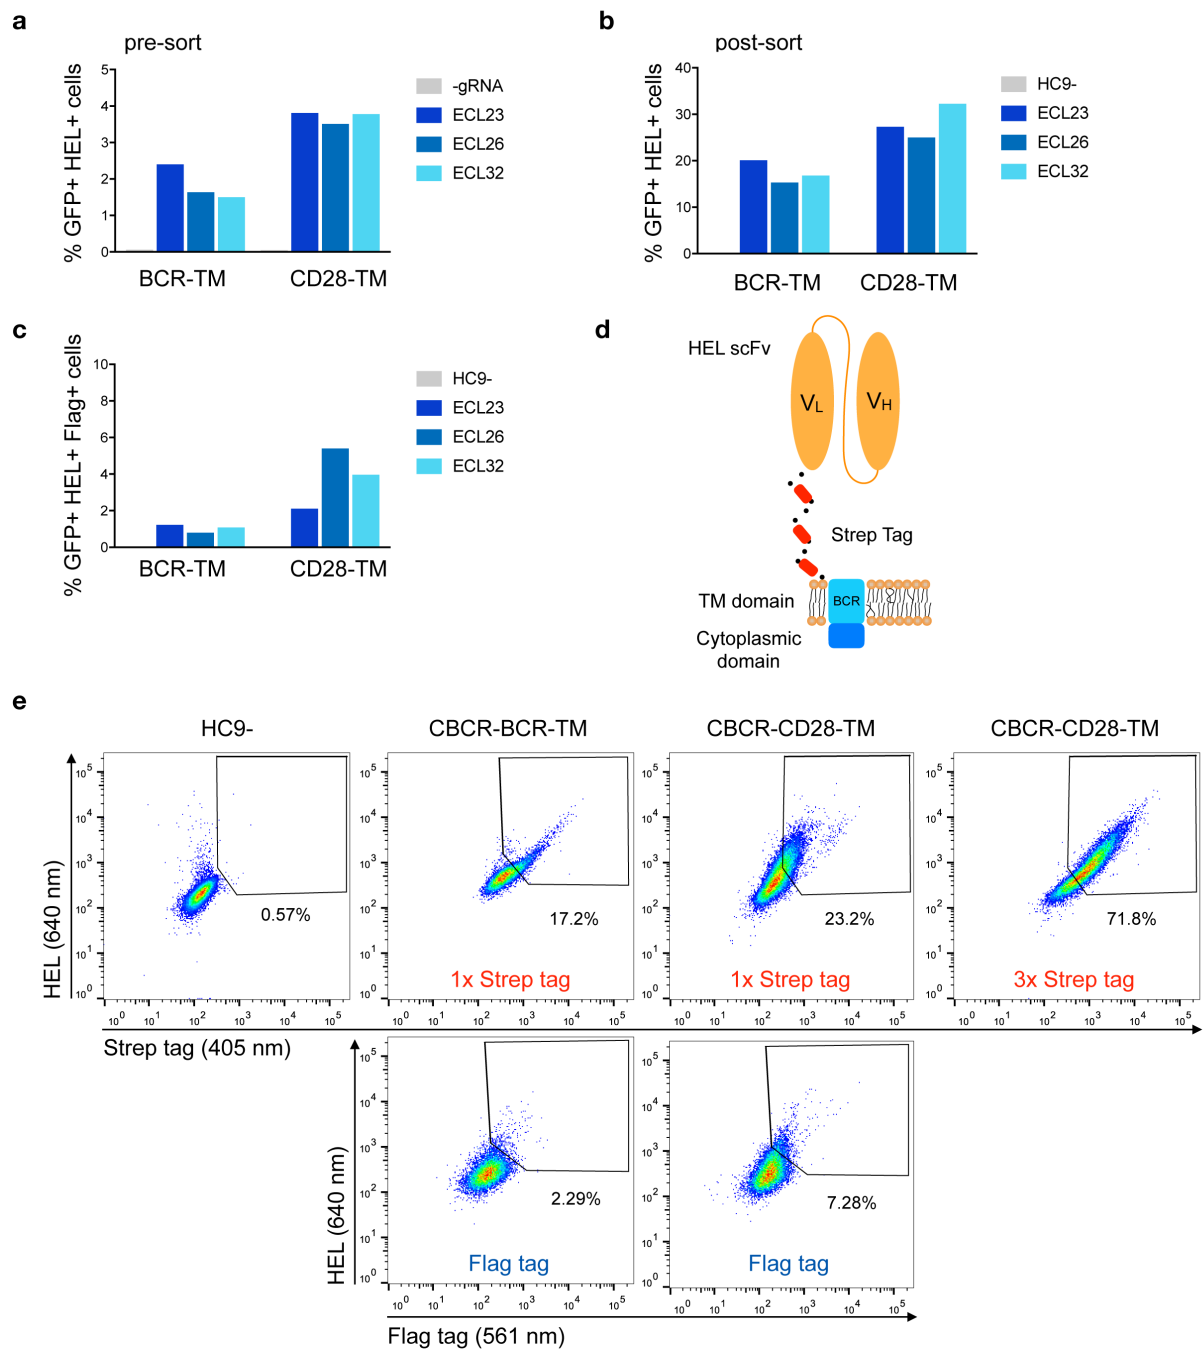

272

273 **Figure 3. Optimization of CBCR receptor design to improve surface expression and the**

274 **detection of surface presentation via tag.** a) The surface expression in hybridomas of representative

275 CBCR constructs was evaluated by flow cytometry before (a) and after (b) enrichment based on GFP

276 expression (488 nm) on day 3 after transfection. Variants shown differ in the transmembrane (TM)

277 domain and the lengths of the extracellular linkers (ECL).

278 c) Bar graph shows percentage of cells detectable via Flag tag within the population (b) of cells showing GFP<sup>+</sup> expression and HEL binding

279 after sorting.

280 d) Schematic of CBCR design shows replacement of Flag epitope with a triple Strep

281 epitope II tag (red).

282 e) CBCR surface expression of GFP sorted cells (488 nm) was quantified by flow

cytometry based on Strep II tag detection (405 nm) using variants that incorporate a single or triplet

Strep epitope (upper row). Antigen recognition was additionally confirmed by HEL binding (640 nm).

283 Representative flow cytometry plots show percentages of HEL binding and Flag<sup>+</sup> (561 nm) cells for the  
284 CBCR variants including the single Flag tag after GFP sorting as a control (lower row).

285

### 286 **Incorporation of a CD79b signaling domain improves CBCR surface expression**

287 In order to generate a functional receptor, an intracellular signaling domain is required  
288 for signal transduction. As the endodomain of surface-bound immunoglobulins (Ig)  
289 itself is very short and incapable of intracellular signal transmission, the endogenous  
290 BCR only functions as a complex composed of the Ig molecule associated with a  
291 heterodimer called Ig- $\alpha$ /Ig- $\beta$  or CD79a/b. The CD79 subunits contain two  
292 immunoreceptor tyrosine-based activation motif (ITAMs) in their cytoplasmic domains,  
293 which recruit Syk tyrosine kinase and mediate B cell activation upon antigen binding  
294 and subsequent phosphorylation<sup>47,48</sup>. Previous work suggested that CD79a and  
295 CD79b are each independently sufficient to trigger protein tyrosine kinase activation  
296 and induction of downstream signaling cascades, as long as the ITAM regions remain  
297 intact<sup>49</sup>. Here, we fused the complete intracellular domain of either the CD79a or  
298 CD79b polypeptide to the short cytoplasmic tail of the Ig molecule at the C-terminal  
299 end (**Fig. 4a**). HC9- cells were transfected with both constructs as previously  
300 described and stable CBCR expression based on HEL binding and Strep tag II  
301 detection was analyzed using flow cytometry after enrichment for GFP<sup>+</sup> cells. CBCR  
302 expression was substantially increased for cells expressing CBCR-CD79b compared  
303 to CBCR-CD79a, which was however higher compared to previous constructs without  
304 intracellular signaling units (**Fig. 3e**, upper row). This suggests that improved  
305 expression or cell-surface transport for the CBCR variant occurs when incorporating  
306 the CD79b signaling domain (**Fig. 4b**). This higher CBCR expression was consistent  
307 across several selected single-cell clones (**Fig. 4c**, right), while GFP expression was  
308 comparable, but intensity was slightly increased for CBCR-CD79b expressing cells  
309 (**Fig. 4c**, left). Genomic PCR analysis using primers p7 and p8 verified precise  
310 integration of the GFP-CBCR-CD79b cassette into the Rosa26 locus in one of the  
311 selected single-cell clones (**Fig. 4d and e**). Conclusively, incorporation of a signaling  
312 domain did not interfere with CBCR surface expression.

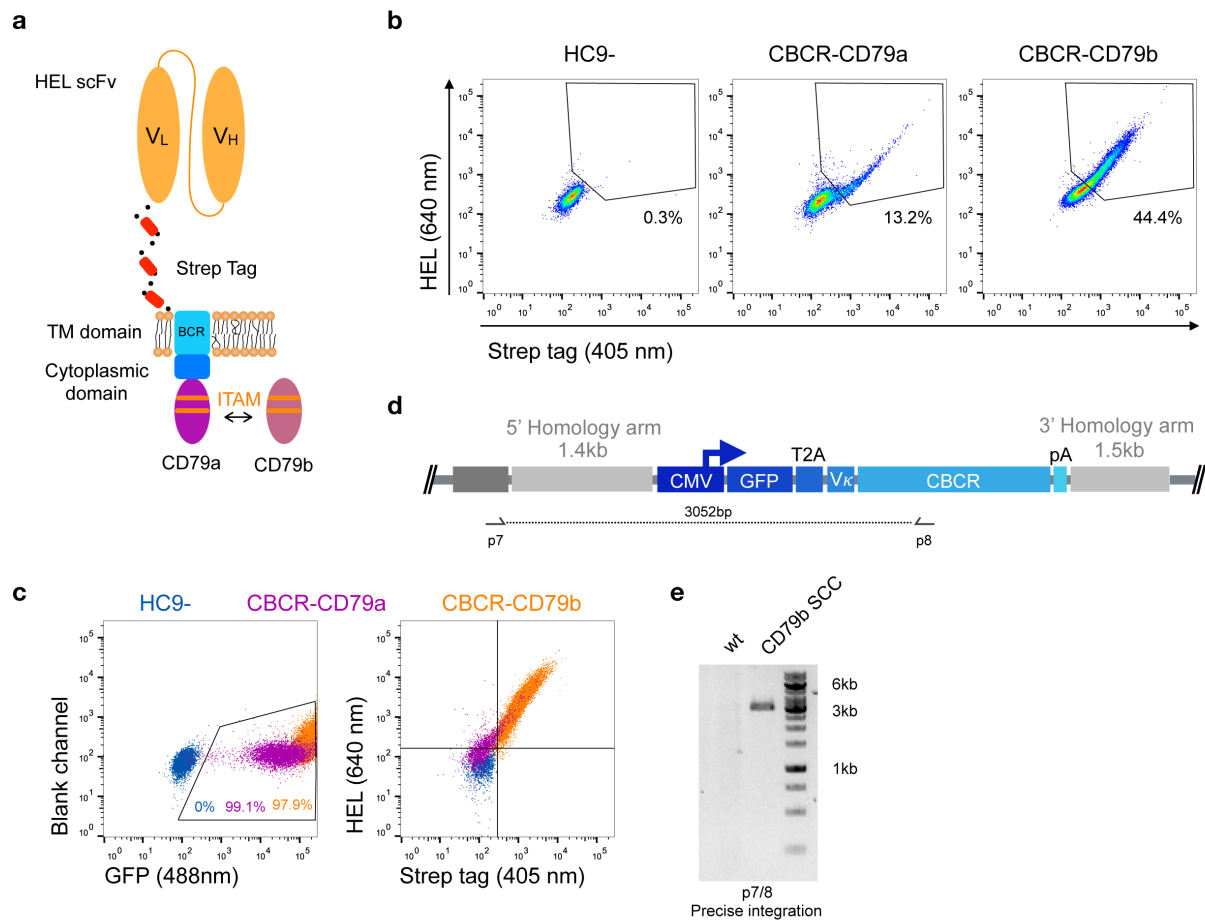

313

314

315

316

317

318

319

320

321

322

323

324

325

326

327

328

329

330

331

332

**Figure 4. Improved surface expression of CBCR with CD79b signaling domain.** a) Schematic of the CBCR complex containing the intracellular domain of either a CD79a or CD79b transmembrane protein C-terminally fused to the cytoplasmic BCR domain. b) Representative flow cytometry dot plots show hybridomas with stable CBCR surface expression based on HEL binding (640 nm) and Strep II tag detection (405 nm) for GFP enriched cells having a CBCR with either the CD79a or CD79b intracellular domain precisely integrated. Data are representative for three independent experiments. c) Flow cytometry dot plots show GFP expression (left) and HEL binding and Strep II tag detection of exemplary single-cell clones following sorting (HEL<sup>+</sup> Strep<sup>+</sup>) on samples in b. Tendency of decreased surface expression for the CBCR with the CD79b intracellular domain was validated in multiple single-cell clones. d) Schematic of primer set for genomic DNA analysis in order to confirm integration of GFP-2A-CBCR cassette at the correct locus (p7/8). e) Genomic PCR analysis verifies the integration of the GFP-T2A-CBCR-CD79b cassette into the correct locus of a single-cell clone (SCC, 3052bp). The band was extracted and Sanger sequencing confirmed the precise integration in the Rosa26 locus.

## Evaluating HDR protocols for primary murine B cells

High genome editing efficiencies are not essential when engineering hybridoma cells, which have the capacity to expand at high rates and can be cultured without time constraints. However, with primary B cells, high HDR efficiencies are very important. We first isolated murine splenic B cells and cultured them using an *in vitro* expansion

333 system based on 40LB feeder cells (Balb/c 3/T3 fibroblasts that stably express BAFF  
334 and CD40 ligand)<sup>50</sup> in the presence of IL-4 up to four days for pre-activation  
335 (**Fig. 5a, c**). Next, we electroporated Cas9-guide RNP complexes together with 5 µg  
336 of PCR-linearized HDR donor template into primary B cells. Three days after  
337 transfection, cells were analyzed and enriched for GFP expression by FACS. Sorted  
338 cells were cultured for an additional six days under activating conditions by replacing  
339 IL-4 with IL-21. CBCR surface expression was determined via flow cytometry and  
340 genomic DNA analysis was performed at Day 10 to confirm precise integration into  
341 the Rosa26 locus (**Fig. 5a**). Overall increase in the number of live B cells on 40LB  
342 feeder cells in presence of IL-4 was only negligibly affected by transfection of Cas9-  
343 RNP and dsDNA as compared to non-transfected cells co-cultured (**Fig. 5b**). In  
344 contrast, primary B cells cultured in the presence of soluble BAFF and IL-4 showed  
345 only a minor level of expansion. (**Fig. 5b**). Subsequently, the influence of pre-activation  
346 on transfection efficiencies was determined. For this purpose, we transfected 10<sup>6</sup>  
347 primary B cells with 2 µg plasmid DNA encoding for a CMV promoter-driven GFP  
348 reporter gene directly after isolation from a mouse spleen or following pre-activation  
349 on 40LB feeder cells for one, two, three, or four days and analyzed GFP expression  
350 by flow cytometry 24 h after transfection. We observed enhanced transfection  
351 efficiencies and viability after pre-activation compared to transfection of freshly  
352 isolated B cells, consistent with previous findings in primary T cells<sup>51</sup>. The highest  
353 transfection efficiency was observed after one day of pre-activation, followed by four  
354 days of pre-activation, suggesting a correlation with the time points of high proliferation  
355 rates. Finally, a protocol was designed to integrate the best condition for transfection  
356 efficiency, one day of pre-activation, with delivery of components previously optimized  
357 in hybridoma cells; however, only very small numbers of precisely edited primary cells,  
358 identified by GFP expression, could be obtained with this workflow (0.1-0.3%).

359

360 Several studies suggest that the use of single-stranded (ss) DNA increases the  
361 frequency of HDR, most notably through the use of adeno-associated virus  
362 (AAV)<sup>52,53,30</sup>. AAV can package a genome of at least 4.9kb, a length sufficient for an  
363 HDR donor template compatible with CBCR and homology arms. Previous studies  
364 have reported relatively high levels of AAV-mediated HDR in multiple cell types,  
365 including T lymphocytes<sup>54,55,56</sup>. To investigate AAV transduction efficiency in primary  
366 murine B cells, we screened several AAV serotypes possessing a reporter GFP gene

367 (Fig. 5d). We transduced B cells after pre-activation on 40LB for one day and analyzed  
368 transient GFP expression by flow cytometry after three days, which represented the  
369 overall transduction efficiency. The highest transduction efficiency was achieved with  
370 the synthetic AAV-DJ serotype (Fig. 5d). Regardless of serotype, we observed  
371 minimal loss in cell viability after exposure to the virus particles. Next, we examined  
372 the frequency of HDR-mediated integration of a larger size transgene delivered by  
373 recombinant AAV-DJ. For this purpose, an HDR donor cassette consisting of a CMV-  
374 driven GFP reporter gene was designed with homology arms of 750bp in size to meet  
375 AAV payload restrictions (Fig. 5e). After pre-activation and electroporation with or  
376 without complete Cas9-RNP, B cells were transduced with AAV-DJ CMV-GFP at  
377 various multiplicity of infections (MOIs) and cultured for an additional six days in the  
378 presence of 40LB cells and IL-21 (Fig. 5f and g). We observed only minor loss in  
379 viability, even at the highest AAV dose. Approximately 3-4% of cells that were treated  
380 with AAV alone (MOI  $1 \times 10^5$ ) showed persistent GFP expression implying a relatively  
381 high background of episomal expression (Fig. 5f). In cells that received both AAV-DJ  
382 delivered HDR donor and Cas9-RNP (targeting the Rosa26) we observed only a  
383 marginal increase in HDR (1.2-1.5-fold), measured by stable GFP expression. When  
384 these conditions are compared with cells receiving Cas9-RNP and an HDR template  
385 in the format of PCR-linearized dsDNA versus PCR-derived template DNA only, we  
386 observed up to a ten-fold increase in HDR efficiency (Fig. 5g). While HDR efficiencies  
387 in primary B cells were only marginally enhanced by AAV-DJ delivered HDR donor,  
388 HDR-mediated integration efficiencies were dramatically improved in hybridoma cells,  
389 suggesting that primary B cells may have inherent limitations in HDR processes  
390 (Fig. S3). When directly compared to dsDNA, we found that AAV-DJ showed slightly  
391 improved HDR-mediated integration, however it also resulted in strong background  
392 GFP expression complicating the discrimination of precisely edited cells especially  
393 considering the limited life span and restrictions in selection of primary B cells in *in*  
394 *vitro* culture (Fig. 5g). The results described here suggest that despite the relatively  
395 low HDR-efficiencies, dsDNA HDR template is more suitable for CRISPR-Cas9-  
396 mediated genome editing in primary B cells due to its reliable discrimination of  
397 successfully modified cells.

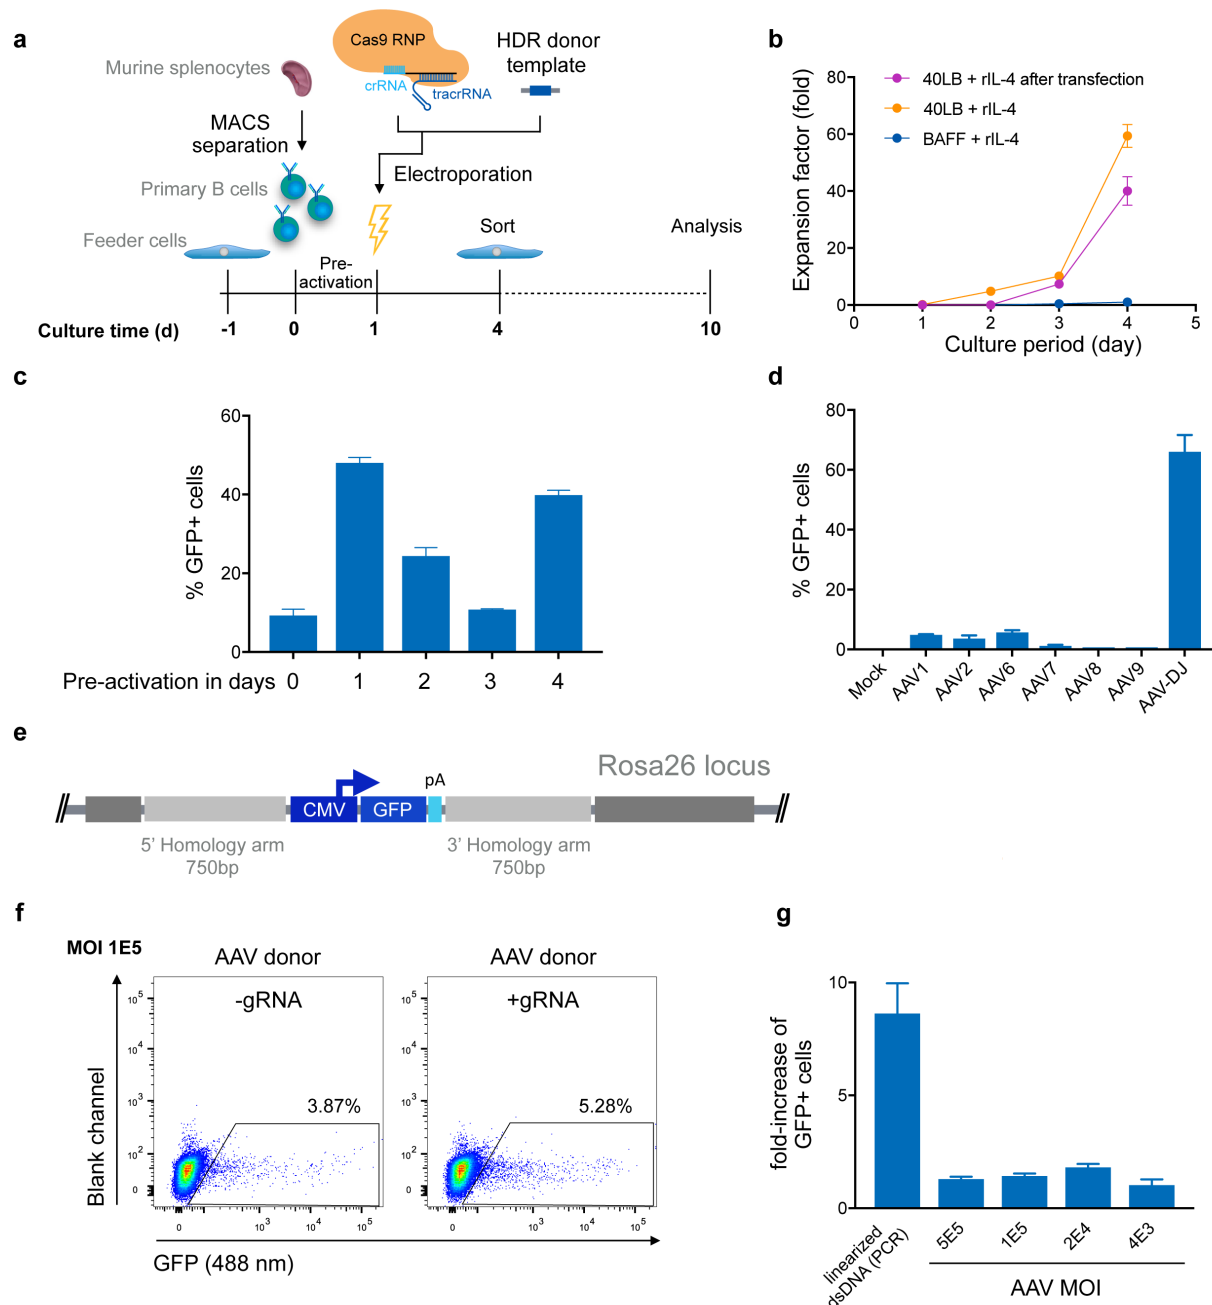

398

399 **Figure 5. Targeted genome editing in primary murine B cells using CRISPR-Cas9.** a) Overview

400 shows timeline of Cas9-gRNA RNP delivery to primary B cells isolated from murine spleen. B cells were

401 initially co-cultured with feeder cells before and after transfection of RNPs and HDR donor template

402 DNA on day 1. Three days after transfection cells were enriched for GFP expression via FACS and

403 analyzed at Day 10 after expansion. b) Cumulative fold increase in the number of live B cells cultured

404 in the following conditions: (i) in presence of soluble BAFF and IL-4; (ii) on 40LB cells in the presence

405 of IL-4, (iii) or on 40LB in the presence of IL-4 and after electroporation with Cas9-RNP and PCR-

406 linearized double-stranded (ds) repair template DNA after pre-activation on 40LB for one day. c)  $10^6$

407 primary B cells were transfected with 2  $\mu$ g plasmid DNA (pMax-GFP) directly after isolation from mouse

408 spleen or following pre-activation on 40LB feeder cells for one, two, three or four days. Data show the

409 percentage of GFP expressing cells determined by flow cytometry 24 h after transfection. Data are

410 presented as the mean and error bars indicate standard deviation (n=2). d) Splenic B cells were pre-  
411 activated for one day and were either mock treated or transduced with GFP-expressing ssAAV using a  
412 comprehensive panel of AAV serotypes (1, 2, 6, 7, 8, 9, or DJ) at a MOI of  $10^5$ . The bar plot shows the  
413 percentages of GFP<sup>+</sup> cells after 72h (n=3, 3 independent experiments). e) Schematic of the HDR donor  
414 cassette encoding for the GFP reporter gene with 750bp flanking homology arms after integration into  
415 the Rosa26 locus. f) After one day of pre-activation on 40LB cells, primary B cells were transfected with  
416 Cas9-RNP immediately followed by HDR repair template delivery via chimeric AAV serotype DJ  
417 encoding the GFP reporter gene. Representative flow cytometry dot plots show GFP expression  
418 (488 nm) on day 9 after genome editing for transduction with a MOI of  $1 \times 10^5$ . Cells transfected only  
419 with Cas9-protein without gRNA and transduced with GFP expressing HDR donor packaged using  
420 scAAV-DJ were used as negative control to determine the level of GFP expression from episomal  
421 retention. g) Data are displayed as fold-increase of AAV-DJ transduced GFP<sup>+</sup> cells receiving the Cas9-  
422 gRNA complex to cells transfected with Cas9-protein only representing the HDR based integration.  
423 Cells transfected with Cas9-protein only indicate the episomal AAV background expression. Cells  
424 transfected with Cas9-RNP and PCR-linearized dsDNA served as control. GFP expression was  
425 measured on day 9 after transfection. All data are means  $\pm$  s.d (n=3).

426

## 427 **Robust CBCR genomic integration and surface expression of CBCR in primary** 428 **B cells**

429 We evaluated the surface expression of the previously optimized CBCR variants in  
430 order to generate primary B cells capable of antigen recognition independent of their  
431 endogenously expressed BCR. For this purpose, we transfected pre-activated B cells  
432 with Cas9-RNP targeting the Rosa26 locus and PCR-derived HDR donor (GFP-T2A-  
433 CBCR-CD79a/b and GFP-T2A-CBCR-BCRTM/CD28TM) and incubated them on  
434 40LB feeder cells in the presence of IL-4 for recovery. At day three after  
435 electroporation, we observed low, but robust HDR-mediated integration levels,  
436 measured by persistent GFP expression, compared to a negative control of cells  
437 receiving PCR-linearized repair template and Cas9 protein without gRNA (**Fig. 6a**,  
438 upper row). GFP<sup>+</sup> cells were enriched via FACS, expanded in the presence of IL-21  
439 and analyzed by flow cytometry for CBCR surface expression based on HEL antigen  
440 binding and Strep tag II detection on day 10 (**Fig. 6b**). We found substantial  
441 enrichment for GFP expressing cells, from which a robust fraction is expressing either  
442 CBCR variant, thus, indicating that CBCR expression is tolerated in primary B cells.  
443 HEL antigen binding by the CBCR does not appear to be inhibited by expression of  
444 native BCR. Similar to our observations in hybridoma B cells, CBCR detection based  
445 on the Flag tag was rather weak (**Fig. 6b, S4a**). Consistent with hybridomas, an



446 enhanced CBCR-CD79b expression compared to CBCR-CD79a was confirmed in  
447 primary B cells. PCR analysis on genomic DNA extracted from primary B cells with or  
448 without FACS mediated enrichment verified the targeted integration of the GFP-T2A-  
449 CBCR cassette into the Rosa26 locus (**Fig. 6c, S4b**). Taken together, these findings  
450 demonstrate that we have developed a reliable and consistent pipeline to precisely  
451 introduce cassettes of several kb size into the genome of primary murine B cells using  
452 CRISPR-Cas9 induced HDR. Furthermore, we were able to show the robust surface  
453 expression of a synthetic, antigen-specific CBCR in primary B cells.  
454

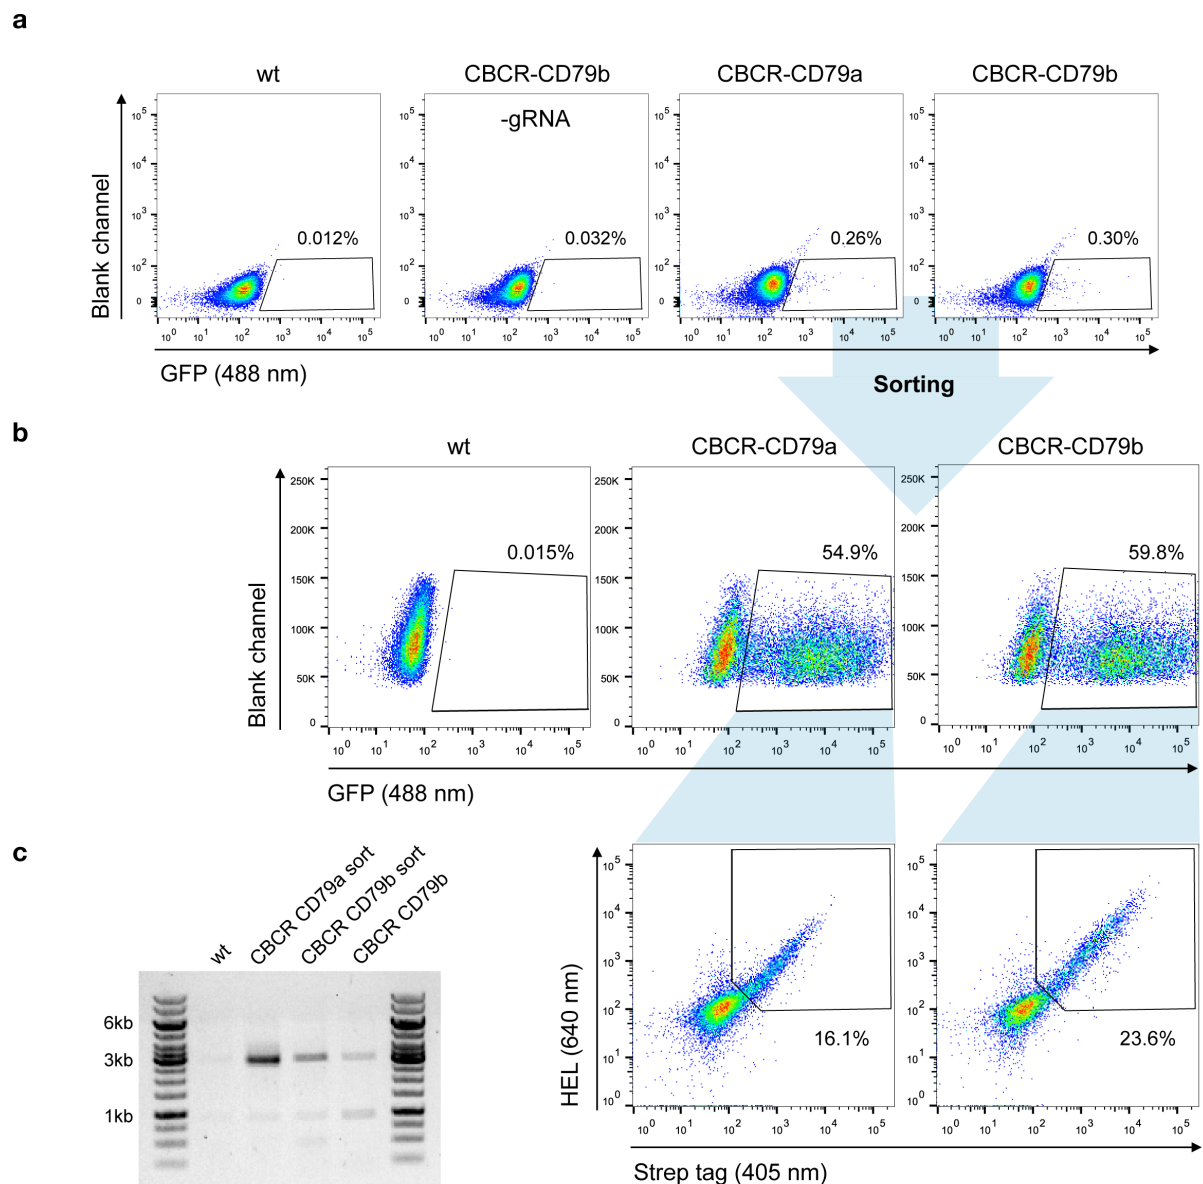

455

456 **Figure 6. Robust and stable CBCR surface expression in primary B cells.** a) Splenic B cells from  
457 C57BL/6-Ly5.1 mice were transfected with Cas9-RNP and HDR donor templates encoding synthetic  
458 CBCR (previously optimized in hybridoma cells, Figure 3 and 4) following 24 h of pre-activation on a

459 40LB feeder cell layer and cultured in the presence of IL-4. Integration efficiencies based on GFP  
460 expression (488 nm) were determined by flow cytometry on day 3 after transfection and GFP<sup>+</sup> cells  
461 were sorted. Primary B cells electroporated without gRNA and non-transfected B cells serve as negative  
462 controls. Flow cytometry plots are representative of three independent experiments. b) Sorted primary  
463 B cells were successfully regenerated during co-culture on 40LB feeder cells and in the presence of  
464 IL-21. Flow cytometry dot plots show efficient enrichment of GFP<sup>+</sup> cells (upper row) and CBCR surface  
465 expression in primary B cells based on HEL antigen binding and detection of the Strep II tag within the  
466 GFP<sup>+</sup> population (lower row). c) Agarose gel shows genomic PCR products (p7/8) that confirm the  
467 targeted integration of the GFP-T2A-CBCR cassette containing the intracellular domain of either CD79  
468 protein (3052bp) before and after sorting.

469

## 470 Discussion

471 Immune cell therapies based on the integration of synthetic antigen receptors  
472 comprise a successful and rapidly expanding therapeutic option for the treatment of  
473 cancer, most notably CAR expressing T cell therapies<sup>1,37,45</sup>. Additional to existing  
474 T cell therapies, B lymphocytes hold promise as novel donor cells for adoptive cell  
475 therapies due to their natural properties, such as longevity and immense protein  
476 secretory capacity<sup>18,19</sup>. Here, we have demonstrated targeted genomic integration in  
477 murine B cells of a novel class of synthetic antigen receptors, CBCR. CBCRs offer a  
478 potential way to activate and expand engineered B cells in antigen-controllable  
479 manner, independent of the endogenously expressed BCR.

480 We designed CBCR constructs to encode an antigen-binding domain consisting of an  
481 scFv, a spacer region that includes a detection tag, a transmembrane domain and  
482 cytoplasmic signaling domains. Detection tags incorporated into the extracellular  
483 spacer provide a valuable identification marker for receptor surface expression. We  
484 observed dramatic differences in secretion and detection of surface expression levels  
485 for the analyzed constructs (**Fig. 1**). Interestingly, both the N- or C-terminal  
486 incorporation of a Myc sequence completely impaired the secretion of the HEL-specific  
487 scFv, suggesting disturbed protein folding or secretion, which is more likely for the tag  
488 fused N-terminally, as the tag sequence directly behind the signal peptide can interfere  
489 with translocation into the secretory pathway. Constructs containing a Strep tag II  
490 showed drastically improved detection and selection of cells engineered with a CBCR  
491 compared to constructs including a Flag tag sequence in the extracellular spacer  
492 region (**Fig. 2b, 3e, S4**). In contrast to the Myc containing constructs, the Flag tag still  
493 enabled surface expression, suggesting compromised Flag tag performance or

494 accessibility. Extracellular linker sequences are expected to provide certain degrees  
495 of scFv flexibility, while still allowing signal transduction. Variations of linker length did  
496 not increase tag accessibility as measured by tag detection with two different  
497 monoclonal antibody clones (M2 and FG4R) and correlation with antigen binding  
498 (**Fig. 3**). In a recent study, similar spacer regions including a Flag tag were used to  
499 successfully detect the surface expression of synthetic antigen receptors in  
500 HEK293FT cells using the antibody clone M2, suggesting that detection and  
501 accessibility of an orthogonal tag sequence are additionally influenced by the cell  
502 type<sup>45</sup>. Furthermore, the length and composition of extracellular spacers have been  
503 reported to be decisive for surface expression and activity of antigen receptors<sup>11,45</sup>.  
504 We tested a series of linker sequences, however and did not observe any effect on  
505 surface expression (**Fig. 3**). In contrast, we found that the transmembrane domain  
506 affected surface expression implying that the transmembrane region also has the  
507 capacity to provide stability to the CBCR (**Fig. 2, 3**). CBCR encoding a CD28-derived  
508 transmembrane domain showed increased surface expression compared to the CBCR  
509 including an endogenous BCR-TM. This result is consistent with previous research  
510 revealing that the CD28 TM domain induces a higher expression of CAR than the  
511 CD3 $\zeta$  TM domain<sup>57</sup>. Our findings support that synthetic receptors require careful  
512 evaluation of their various components in order to have an optimized expression and  
513 detection system.

514 The signaling proteins CD79a and CD79b are required for the transport of a BCR to  
515 the cell surface and for signal transduction<sup>58,59</sup>. Our results show that the inferior  
516 surface expression of constructs containing the IgG2c-TM could be partially rescued  
517 by fusing the short intracellular tail to the cytoplasmic domain of a CD79 protein  
518 (**Fig. 4, 6**). Previous work suggested that CD79a and CD79b are independently  
519 sufficient to drive B cell maturation and activation, as long as the ITAM regions of the  
520 intracellular signaling domain remain intact<sup>49</sup>. Additionally, our results reflect the  
521 improved surface transport of the CD79b construct compared to the CD79a receptor,  
522 in accordance with this previous work (**Fig. 4, 6**).

523 In order to evaluate highly expressed CBCR variants in primary B cells, we developed  
524 a reliable pipeline to genomically integrate large gene cassettes by Cas9-driven HDR  
525 (**Fig. 5**). While many years of work have aimed to reprogram immune cells for  
526 therapeutic purposes, such as CAR T cell therapy, these have almost exclusively

527 relied on viral-based gene transfer. Recently, genome editing platforms providing  
528 targeted integration, most notably CRISPR-Cas9, have become promising tools to  
529 further improve current immune cell therapies, by offering potential advantages related  
530 to safety, uniform expression levels and potency<sup>56,60,61,62</sup>. Establishing a preclinical  
531 genome editing platform based on primary murine B cells does not only show progress  
532 on cellular engineering of technically challenging target cell lines, but also allows the  
533 investigation of these cells as novel vehicle for adoptive immune cell therapies. We  
534 observed robust transfection efficiencies (electroporation by nucleofection) in primary  
535 B cells following pre-activation and expansion on fibroblast feeder cells expressing  
536 BAFF and CD40 ligand. Cas9-RNP-mediated HDR of double-stranded DNA occurred  
537 consistently, but with relatively low efficiencies when compared to other primary  
538 lymphocyte cells, such as T cells<sup>61,51</sup>. Furthermore, in contrast to observations in  
539 multiple other cell types including T and stem cells, AAV delivery of the HDR donor  
540 only marginally increased HDR frequencies in primary B cells, suggesting that low  
541 HDR efficiencies are independent of template format and transfection efficiencies<sup>54,60</sup>.  
542 Notably, the AAV format caused a relatively high background of gene expression from  
543 episomal retention of DNA (**Fig. 5f, g**). Our results imply that, for constructs that use  
544 a constitutive promoter for gene expression, AAV-based template delivery in primary  
545 murine B cells may not be sensitive enough to effectively distinguish edited cells from  
546 episomal expression. However, it may be beneficial for approaches that are designed  
547 such that only correct integration leads to gene expression (i.e. splicing or use of  
548 endogenous promoter)<sup>29,63</sup>. We found dramatically enhanced HDR-mediated  
549 integration efficiencies in hybridoma B cells using the same AAV-DJ template targeting  
550 the same genomic locus (**Fig. S3**), thus the low HDR frequencies in primary murine  
551 B cells are not related generally to inefficient delivery of genome editing reagents or  
552 to lack of or targeting specificity. In the future, it would be valuable to determine the  
553 potential causes for these inherent limitations of HDR in primary murine B cells; a  
554 sensible hypothesis is an upregulation of inhibitory factors for HDR. In fact, very low  
555 activity of conservative HDR, known for its high-fidelity, has been described before,  
556 while error-prone, non-conservative homologous recombination causing deletions,  
557 gene fusions and other genetic aberrations<sup>64</sup> seem to predominate. Nevertheless, in  
558 the context of human B cells, Cas9-RNP with AAV-6 donor has been reported to be  
559 highly efficient (at least 10% HDR rate; 100-fold higher than what we observed in this

560 study), emphasizing once more that the differences between murine and human cells  
561 must not be underestimated<sup>19,34</sup>.

562 The clear discrimination of edited cells using PCR-derived HDR donor still offers a  
563 very reliable tool to develop new concepts for cellular therapies. Recently, Hung *et al.*  
564 used an interesting strategy in primary human B cells by combining gene disruption  
565 for plasma cell differentiation with engineering of these cells to secrete a therapeutic  
566 protein, followed by *in vivo* transfer in immunodeficient mice<sup>19</sup>. To further evaluate and  
567 optimize *in vivo* stability, our approach for cellular engineering in primary murine  
568 B cells enables studies that include adoptive transfer to immunocompetent mouse  
569 models, which will be valuable for developing novel B cell-based immunotherapies.

570

## 571 **Methods**

### 572 **Preparation of HDR donor templates**

573 All primers were ordered from Integrated DNA Technologies (IDT) and sequences are  
574 listed in Supplementary Table **S1**. HDR donor constructs were cloned by Gibson  
575 assembly using the Gibson Assembly Master Mix (NEB, E2611S) into the pUC57(Kan)  
576 cloning vector, obtained from Genewiz. The vector was designed with homology arms  
577 PCR-amplified from C57BL/6-Ly5.1 genomic DNA according to the mouse genomic  
578 sequence (Gt(ROSA)26Sor gene) and Sanger sequenced (pUC57-Rosa26). Codon-  
579 optimized nucleotide sequences encoding each transgene or parts of it were  
580 synthesized (gBlocks, IDT) or generated by PCR from previously characterized CBCR  
581 expression vectors. Anti-HEL scFv was derived from the high-affinity HyHEL10  
582 antibody in the V<sub>L</sub>-V<sub>H</sub> format or codon-optimized for mice from the D1.3 variant M3  
583 scFv (CA2787677A1). M3 scFv was linked by extracellular spacer regions  
584 incorporating different detection tags (Myc, Flag, Strep II) to either a BCR or CD28  
585 transmembrane domain. These TM domains are fused to the short intracellular tail of  
586 the BCR C-terminally followed by the cytosolic domain of either the CD79a or CD79b  
587 polyprotein. All CBCRs contain an N-terminal V<sub>L</sub> signal peptide for membrane targeting.  
588 The GFP reporter gene and T2A-CBCR constructs were cloned into the pUC57-  
589 Rosa26 under the control of a CMV promoter. HDR donor vectors were linearized by  
590 PCR with the KAPA Hifi HotStart ReadyMix (KAPA Biosystems, KK2602) using either  
591 p9 and p10 or p11 and p12 (HA 750bp each) for direct comparison with AAV delivered  
592 HDR donor. For each PCR, the reaction was split between a minimum of five separate

593 tubes and then pooled for subsequent steps. This split-pool PCR approach was used  
594 to minimize the chance of mutations in the repair template arising from PCR. The PCR  
595 product was purified using DNA Clean & Concentrator™-5 (Zymo, D4013), eluted in  
596 nuclease-free (NF) H<sub>2</sub>O, and concentrated to ~1 µg µl<sup>-1</sup> using a Concentrator 5301  
597 (Eppendorf).

598

## 599 **Mice**

600 C57BL/6-Ly5.1 mice were obtained by in-house breeding and were maintained in the  
601 mouse facility under specific pathogen-free conditions. Mouse procedures were  
602 performed under protocols approved by the Basel-Stadt cantonal veterinary office  
603 (Basel-Stadt Kantonales Veterinäramt Tierversuchsbewilligung #2701).

604

## 605 **Cell culture**

606 All cell lines were maintained in incubators at 37 °C and 5% CO<sub>2</sub> and were confirmed  
607 to be negative for *Mycoplasma* contamination using a mycoplasma detection kit  
608 (ATCC, 30-1012K). If required, the live cell number was counted by the trypan blue  
609 dye exclusion method using the TC 10 Automated Cell Counter (Bio-Rad). All B cell  
610 hybridoma lines were cultivated in high-glucose Dulbecco's Modified Eagle Medium  
611 (DMEM) containing GlutaMAX supplemented with 10% FBS, 100 U ml<sup>-1</sup>  
612 penicillin/streptomycin, 10 mM HEPES buffer and 50 µM 2-mercaptoethanol.  
613 Hybridomas were typically maintained as 5ml cultures in T-25 flasks and passaged  
614 every 48 to 72 hours. A list of all hybridoma cell lines is provided in Supplementary  
615 Table **S3**. Balb/c 3T3 fibroblast derived 40LB feeder cells were previously generated  
616 by Nojima *et al.*<sup>50</sup>, maintained in high-glucose DMEM containing GlutaMAX  
617 supplemented with 10% FBS and 100 U ml<sup>-1</sup> and passaged at 90% confluence. To  
618 prepare the feeder layer, 40LB cells were plated at 4 x 10<sup>4</sup> per cm<sup>2</sup> about 16 h before  
619 co-culture and irradiated with 60 Gy γ-ray. Splenic B cells were pre-activated in a T-  
620 75 flask in the presence of irradiated 40LB feeder cells in 40 ml RPMI-1630 medium  
621 supplemented with 10% FBS (consistently coming from the same batch), 1 mM Na-  
622 Pyruvate, 10 mM HEPES buffer, 100 U ml<sup>-1</sup> Penicillin/Streptomycin and 50 µM 2-  
623 Mercaptoethanol for 24 h. rIL-4 (1 ng ml<sup>-1</sup>, Peprotech) was added to the primary  
624 culture for four days. From day 4, cells were cultivated on a new feeder layer with  
625 rIL-21 (10 ng ml<sup>-1</sup>, Peprotech).

## 626 **Splenic B cell isolation**

627 Single cell suspensions of splenocytes were generated from C57BL/6-Ly5.1 mouse  
628 spleen under sterile conditions by passing cells through a 70  $\mu$ M cell strainer using the  
629 plunge of a syringe. Subsequently, cells were counted and pelleted at 300g for 10 min  
630 at 4 °C before resuspending them in autoMACS running buffer (Miltenyi Biotech).  
631 Highly pure resting B cells were isolated by magnetic labeling and depletion of CD43-  
632 expressing B cells and non-B cells using the Mouse B cell Isolation Kit (Miltenyi  
633 Biotech, 130-090-862) and MACS LS columns (Miltenyi Biotech) following vendor  
634 instructions. For activation, up to  $3 \times 10^7$  cells were plated in a T-75 flask on a 40LB  
635 feeder cell layer for 24 h, if not described differently.

636

## 637 **Gene editing in primary murine B cells**

638 24 h after initiating B cell activation on the feeder layer, B cells including the 40LB  
639 feeder cells were harvested by collecting the growth medium and dissociating the  
640 adherent cells by adding 3 ml autoMACS running buffer (Miltenyi Biotech) to the T-75  
641 flask. Prior to transfection, customized Alt-R crRNA and Alt-R tracrRNA (Alt-R®  
642 CRISPR-Cas9 System, IDT) were complexed at equimolar concentrations by  
643 incubation at 95 °C for 5 min. crRNAs were designed using the Broad institute  
644 single guide RNA (sgRNA) design tool (<http://portals.broadinstitute.org/gpp/public/analysis-tools/sgrna-design>). Sequences of all tested gRNAs are listed in Supplementary  
645 **Table S2**. All genome editing experiments performed utilized Cas9 from  
646 *Streptococcus pyogenes* (SpCas9) purchased from IDT. Pre-activated B cells were  
647 transfected using the P4 Primary Cell 4D-Nucleofector X Kit L (Lonza, V4XP-4024) in  
648 combination with the program DI-100. The following standard conditions in 100  $\mu$ l total  
649 volume of nucleofection mix were used, if not described differently:  $1 \times 10^6$  cells, 20  $\mu$ g  
650 Cas9 protein complexed with 0.156 nmol Alt-R duplex gRNA at 1:1.125 ratio and 5  $\mu$ g  
651 of linearized double-stranded DNA generated by PCR. After electroporation, edited  
652 cells were seeded in 5-6ml culturing medium supplemented with rIL-4 into a 6-well  
653 plate in the presence of irradiated 40LB cells ( $5 \times 10^5$  cells per well). Two days after  
654 transfection (Day 3), the B cell culturing medium was replaced by carefully aspirating  
655 the medium and adding 5 ml of fresh B cell medium supplemented with rIL-4. One day  
656 later (Day 4), primary B cells were harvested and prepared for flow cytometry analysis.

## 658 **Gene editing in hybridoma cells**

659 Genome editing experiments in B cell hybridomas were always executed in the HC9-  
660 cell line being dysfunctional in antibody expression and constitutively expressing Cas9  
661 protein<sup>30</sup>. Hybridoma cells were electroporated using the SF Cell Line 4D-Nucleofector  
662 X Kit L (Lonza, V4XC-2024) with the program CQ-104. The following standard  
663 conditions in 100 µl of total volume of nucleofection mix were used: 1 x 10<sup>6</sup> cells,  
664 0.156 nmol pre-complexed Alt-R duplex gRNA and 5 µg of PCR-linearized double-  
665 stranded DNA. Following transfection, cells were incubated for 5 min at RT, before  
666 adding 500 µl of pre-warmed medium to the nucleocuvette and transferring them to  
667 1.5 ml of fresh growth medium in 6-well plates. The cells were usually supplemented  
668 24 h later with 0.5-1.0 ml of fresh culturing medium.

669

### 670 **Transduction with AAV**

671 AAV vector plasmids were cloned in the pMD13-AAV plasmid containing inverted  
672 terminal repeats from AAV serotype 2. HDR donor cassettes including a GFP gene  
673 under the control of a CMV promoter and a SV40 polyA sequence flanked by 750bp  
674 homology arms of the Rosa26 locus were inserted into the multiple cloning site (MCS)  
675 by NotI restriction digest. Cloning was performed in the suitable bacterial strain Stbl3.  
676 AAV stocks were produced by the Viral Vector Facility (VVF) of the Neuroscience  
677 Center Zurich. The optimal AAV serotype for the transduction of primary murine B cells  
678 was evaluated by adding ssAAV with a GFP coding sequence packaged using various  
679 serotypes (AAV1, 2, 6, 7, 8, 9, DJ) at an MOI of 2.5 x 10<sup>10</sup> to B cells pre-activated for  
680 24 h. For samples transduced with AAV for HDR template delivery, AAV-DJ donor  
681 vector was added to the culture immediately after electroporation at an MOI (vector  
682 genomes/cell) of 20,000 – 5 x 10<sup>5</sup> and cultured as described for transfected cells. AAV  
683 donor was added as 10% of the final culture volume regardless of titer.

684

### 685 **Genomic analysis of CRISPR-Cas9 targeting**

686 The activity of gRNAs targeting the Rosa26 locus were initially tested by induction of  
687 NHEJ. Cells transfected with Cas9-RNP targeting the Rosa26 locus were harvested  
688 four days after electroporation, washed once in PBS and genomic DNA was recovered  
689 from 1 x 10<sup>6</sup> cells using 100 µl Quick Extract solution (Epicentre) according to the  
690 manufacturer's instructions. Small fragments of DNA covering the putative cleavage  
691 sites were amplified by PCR with KAPA Hifi HotStart Ready Mix (KAPA Biosystems,  
692 KK2602) from the genomic DNA using primers p13 and p14. Control DNA was also



693 amplified from wildtype C57BL/6-Ly5.1 genomic DNA. CRISPR-Cas9 cleavage of the  
694 genome was determined using a Surveyor Mutation Detection Kit (IDT, 706020). All  
695 samples were run on 2% gels for the detection of cleavage products. For reference,  
696 GeneRuler 1 kb DNA Ladder (Thermo, SM0314) and GeneRuler 100bp DNA Ladder  
697 (Thermo, SM0243) were used as DNA size markers.

698

### 699 **Measuring targeted integration of CBCR construct**

700 For the evaluation of transgene integration, PCR analysis was performed on genomic  
701 DNA extracted from sorted cells or single-cell clones excluding the presence of  
702 remaining repair template. Primer p3 and p4, closely flanking the gRNA targeting site  
703 in the Rosa26 locus in combination with KAPA Hifi HotStart Ready Mix were used with  
704 the following PCR conditions: 35 cycles with annealing at 62 °C (15 s), elongation at  
705 72 °C (1:30 min) and final elongation at 72 °C (3:00 min).

706 To determine targeted integration mediated via HDR, PCR was performed on genomic  
707 DNA using primers binding inside the construct cassette and outside of homology arm.  
708 Primer p5 and p6 were used with the following cycling conditions: 35 cycles with  
709 annealing at 69 °C (15 s), elongation at 72 °C (1:30 min), final elongation at 72 °C  
710 (3:00 min), primer p7 and p8: 35 cycles with annealing at 71 °C (15 s), elongation at  
711 72 °C (1:30 min), final elongation at 72 °C (3:00 min), primer p7 and p15: 35 cycles  
712 with annealing at 73 °C (15 s), elongation at 72 °C (1:30 min), final elongation at 72 °C  
713 (3:00 min).

714

### 715 **Evaluation of scFv expression by RT-PCR**

716 To confirm transcript expression of the HEL-specific scFv variants, mRNA was isolated  
717 from  $1 \times 10^6$  transfected or GFP-bulk sorted hybridoma and parental HC9- cells using  
718 200µl TRIzol® reagent (Thermo, 15596-026). The mRNA was purified using the  
719 PureLink Mini Kit (Invitrogen, Thermo) according to the manufacturer's instructions.  
720 First-strand cDNA was synthesized from mRNA using Maxima Reverse Transcriptase  
721 (Thermo, EP0742) and used as template DNA for subsequent PCR reactions. For the  
722 detection of correct transcript expression, the following cycling conditions were applied  
723 using KAPA Hifi HotStart Ready Mix and p1 and p2, binding to GFP and the SV40  
724 polyA sequence: 25 cycles with annealing at 61 °C (15s), elongation at 72 °C (1 min),  
725 final elongation at 72 °C (2 min).

## 726 **Measuring scFv secretion by ELISA**

727 Three days prior to measuring culture scFv levels, GFP<sup>+</sup> sorted cells were collected,  
728 counted and then resuspended in new culture medium. After three days, the cell  
729 culture supernatant was collected from  $1 \times 10^6$  cells and normalized to least-  
730 concentrated sample. scFv secretion levels were analyzed by ELISA after coating with  
731 HEL antigen (Sigma-Aldrich, 62971,  $4 \mu\text{g ml}^{-1}$ ) in PBS (Thermo, 10010-015). The  
732 plates were then blocked with PBS supplemented with 2% m/v milk (AppliChem,  
733 A0830) and 0.05% V/V Tween-20 (AppliChem, A1389, PBSMT) followed by three  
734 washing steps with PBS supplemented with Tween-20 0.05% V/V (PBST).  
735 Supernatants were then serially diluted (at 1:3 ratio) in PBSMT, starting from the non-  
736 diluted supernatant as the highest concentration. Supernatants were incubated for 1 h  
737 at RT, followed by three washing steps with PBST and incubation with HRP-  
738 conjugated anti-Myc antibody (9E10, Thermo Fisher Scientific, MA1-81357) or anti-  
739 Flag antibody (FG4R, Thermo Fisher Scientific, MA1-91878-HRP) at  $2 \mu\text{g ml}^{-1}$  (1:500  
740 dilution from stock) in PBSTM. After three more washing steps with PBST, ELISA  
741 detection was performed using a 1-Step Ultra TMB-ELISA Substrate Solution (Thermo,  
742 34028), reaction was terminated with  $\text{H}_2\text{SO}_4$  (1 M). Absorbance at 450 nm was  
743 measured using an Infinite 200PRO NanoQuant plate reader (Tecan). ELISA data  
744 were analysed with the software GraphPad Prism.

745

## 746 **Flow cytometry analysis and sorting for immunophenotyping**

747 Flow cytometry-based analysis and cell isolation were performed on a 5 laser BD LSR  
748 Fortessa<sup>TM</sup> flow cytometer and BD FACS Aria III (BD Biosciences), respectively. Data  
749 were analyzed with FlowJo software (Tree Star).

750 24 h post transfection in any of the cell lines,  $\sim 100 \mu\text{l}$  were collected and analyzed for  
751 GFP expression (via GFP-T2A). Primary B cells were only harvested for sorting on  
752 GFP expression three days after transfection. Hybridoma cells were enriched for GFP  
753 expressing cells three days post transfection, if not indicated differently. After sorting  
754 and expansion primary B cells or hybridoma cells were labeled with HEL-antigen,  
755 conjugated to Alexa Fluor 647 dye using the Alexa Fluor®647 Protein Labeling Kit  
756 (Thermo Fisher Scientific, A20173) according to the manufacturer's instructions, and  
757 antibodies binding the respective detection tag to determine CBCR surface expression.  
758 For this purpose, cells were washed with phosphate-buffered saline (PBS), incubated  
759 with the labeling antibody or antigen for 30 min on ice or 10 min at RT, protected from

760 light, washed again with PBS and analyzed or sorted. Biotinylated antibodies were  
761 stained with Streptavidin-BV421 (Biolegend). Staining with propidium iodide (PI, BD  
762 BioSciences) was used for live/dead cell discrimination as directed by the  
763 manufacturer. When primary B cells that had been cultured on a 40LB feeder layer  
764 were analyzed, 40LB feeder cells were excluded based on FSC versus SSC. The  
765 labeling reagents and working concentrations are described in Supplementary Table  
766 S4.  
767

768 **References**

769

- 770 1. Kalos, M. *et al.* T Cells with Chimeric Antigen Receptors Have Potent Antitumor Effects  
771 and Can Establish Memory in Patients with Advanced Leukemia. *Sci. Transl. Med.* **3**,  
772 95ra73-95ra73 (2011).
- 773 2. Ronson, A., Tvito, A. & Rowe, J. M. Treatment of Relapsed/Refractory Acute  
774 Lymphoblastic Leukemia in Adults. *Curr. Oncol. Rep.* **18**, 39 (2016).
- 775 3. Jain, M. D., Bachmeier, C. A., Phuoc, V. H. & Chavez, J. C. Axicabtagene ciloleucel (KTE-  
776 C19), an anti-CD19 CAR T therapy for the treatment of relapsed/refractory aggressive B-  
777 cell non-Hodgkin's lymphoma. *Ther. Clin. Risk Manag.* **14**, 1007–1017 (2018).
- 778 4. Friedman, K. M. *et al.* Effective Targeting of Multiple B-Cell Maturation Antigen–  
779 Expressing Hematological Malignancies by Anti-B-Cell Maturation Antigen Chimeric  
780 Antigen Receptor T Cells. *Hum. Gene Ther.* **29**, 585–601 (2018).
- 781 5. Zhang, N. & Bevan, M. J. CD8+ T Cells: Foot Soldiers of the Immune System. *Immunity*  
782 **35**, 161–168 (2011).
- 783 6. Lim, W. A. & June, C. H. The Principles of Engineering Immune Cells to Treat Cancer. *Cell*  
784 **168**, 724–740 (2017).
- 785 7. Turtle, C. J. *et al.* CD19 CAR–T cells of defined CD4+:CD8+ composition in adult B cell ALL  
786 patients. *J. Clin. Invest.* **126**, 2123–2138
- 787 8. Maude, S. L., Barrett, D., Teachey, D. T. & Grupp, S. A. Managing Cytokine Release  
788 Syndrome Associated With Novel T Cell-Engaging Therapies. *Cancer J. Sudbury Mass* **20**,  
789 119–122 (2014).

- 790 9. Kuwana, Y. *et al.* Expression of chimeric receptor composed of immunoglobulin-derived  
791 V regions and T-cell receptor-derived C regions. *Biochem. Biophys. Res. Commun.* **149**,  
792 960–968 (1987).
- 793 10. June, C. H., O'Connor, R. S., Kawalekar, O. U., Ghassemi, S. & Milone, M. C. CAR T cell  
794 immunotherapy for human cancer. *Science* **359**, 1361–1365 (2018).
- 795 11. Hudecek, M. *et al.* The non-signaling extracellular spacer domain of chimeric antigen  
796 receptors is decisive for in vivo antitumor activity. *Cancer Immunol. Res.* **3**, 125–135  
797 (2015).
- 798 12. Kudo, K. *et al.* T lymphocytes expressing a CD16 signaling receptor exert antibody-  
799 dependent cancer cell killing. *Cancer Res.* **74**, 93–103 (2014).
- 800 13. De Munter, S. *et al.* Nanobody Based Dual Specific CARs. *Int. J. Mol. Sci.* **19**, (2018).
- 801 14. Urbanska, K. *et al.* A universal strategy for adoptive immunotherapy of cancer through  
802 use of a novel T cell antigen receptor. *Cancer Res.* **72**, 1844–1852 (2012).
- 803 15. Guedan, S. *et al.* Enhancing CAR T cell persistence through ICOS and 4-1BB  
804 costimulation. *JCI Insight* **3**,
- 805 16. Ali, S. A. *et al.* T cells expressing an anti-B-cell maturation antigen chimeric antigen  
806 receptor cause remissions of multiple myeloma. *Blood* **128**, 1688–1700 (2016).
- 807 17. Slifka, M. K., Antia, R., Whitmire, J. K. & Ahmed, R. Humoral Immunity Due to Long-Lived  
808 Plasma Cells. *Immunity* **8**, 363–372 (1998).
- 809 18. Radbruch, A. *et al.* Competence and competition: the challenge of becoming a long-lived  
810 plasma cell. *Nat. Rev. Immunol.* **6**, 741–750 (2006).
- 811 19. Hung, K. L. *et al.* Engineering Protein-Secreting Plasma Cells by Homology-Directed  
812 Repair in Primary Human B Cells. *Mol. Ther.* **26**, 456–467 (2018).

- 813 20. Kim, E.-K. *et al.* Enhanced antitumor immunotherapeutic effect of B-cell-based vaccine  
814 transduced with modified adenoviral vector containing type 35 fiber structures. *Gene*  
815 *Ther.* **21**, 106–114 (2014).
- 816 21. Hellebrand, E. *et al.* Epstein–Barr virus vector-mediated gene transfer into human B  
817 cells: potential for antitumor vaccination. *Gene Ther.* **13**, 150–162 (2006).
- 818 22. Serafini, M., Naldini, L. & Introna, M. Molecular evidence of inefficient transduction of  
819 proliferating human B lymphocytes by VSV-pseudotyped HIV-1-derived lentivectors.  
820 *Virology* **325**, 413–424 (2004).
- 821 23. Frecha, C. *et al.* Efficient and stable transduction of resting B lymphocytes and primary  
822 chronic lymphocyte leukemia cells using measles virus gp displaying lentiviral vectors.  
823 *Blood* **114**, 3173–3180 (2009).
- 824 24. Calderón-Gómez, E. *et al.* Reprogrammed quiescent B cells provide an effective cellular  
825 therapy against chronic experimental autoimmune encephalomyelitis. *Eur. J. Immunol.*  
826 **41**, 1696–1708 (2011).
- 827 25. Wang, X. *et al.* Immune Tolerance Induction to Factor IX through B Cell Gene Transfer:  
828 TLR9 Signaling Delineates between Tolerogenic and Immunogenic B Cells. *Mol. Ther.* **22**,  
829 1139–1150 (2014).
- 830 26. Cong, L. *et al.* Multiplex Genome Engineering Using CRISPR/Cas Systems. *Science* **339**,  
831 819–823 (2013).
- 832 27. Mali, P. *et al.* RNA-Guided Human Genome Engineering via Cas9. *Science* **339**, 823–826  
833 (2013).
- 834 28. Hsu, P. D., Lander, E. S. & Zhang, F. Development and applications of CRISPR-Cas9 for  
835 genome engineering. *Cell* **157**, 1262–1278 (2014).

- 836 29. Pogson, M., Parola, C., Kelton, W. J., Heuberger, P. & Reddy, S. T. Immunogenomic  
837 engineering of a plug-and-(dis)play hybridoma platform. *Nat. Commun.* **7**, 12535 (2016).
- 838 30. Mason, D. M. *et al.* High-throughput antibody engineering in mammalian cells by  
839 CRISPR/Cas9-mediated homology-directed mutagenesis. (2018). doi:10.1101/285015
- 840 31. Cheong, T.-C., Compagno, M. & Chiarle, R. Editing of mouse and human immunoglobulin  
841 genes by CRISPR-Cas9 system. *Nat. Commun.* **7**, 10934 (2016).
- 842 32. Chu, V. T. *et al.* Efficient CRISPR-mediated mutagenesis in primary immune cells using  
843 CrispRGold and a C57BL/6 Cas9 transgenic mouse line. *Proc. Natl. Acad. Sci. U. S. A.* **113**,  
844 12514–12519 (2016).
- 845 33. Wu, C.-A. M. *et al.* Genetic engineering in primary human B cells with CRISPR-Cas9  
846 ribonucleoproteins. *J. Immunol. Methods* **457**, 33–40 (2018).
- 847 34. Johnson, M. J., Laoharawee, K., Lahr, W. S., Webber, B. R. & Moriarity, B. S. Engineering  
848 of Primary Human B cells with CRISPR/Cas9 Targeted Nuclease. *Sci. Rep.* **8**, (2018).
- 849 35. Ran, F. A. *et al.* Genome engineering using the CRISPR-Cas9 system. *Nat. Protoc.* **8**,  
850 2281–2308 (2013).
- 851 36. Chng, J. *et al.* Cleavage efficient 2A peptides for high level monoclonal antibody  
852 expression in CHO cells. *mAbs* **7**, 403–412 (2015).
- 853 37. Roybal, K. T. *et al.* Engineering T Cells with Customized Therapeutic Response Programs  
854 Using Synthetic Notch Receptors. *Cell* **167**, 419-432.e16 (2016).
- 855 38. Wörn, A. & Plückthun, A. Stability engineering of antibody single-chain Fv fragments. *J.*  
856 *Mol. Biol.* **305**, 989–1010 (2001).
- 857 39. Phan, T. G. *et al.* B Cell Receptor-independent Stimuli Trigger Immunoglobulin (Ig) Class  
858 Switch Recombination and Production of IgG Autoantibodies by Anergic Self-Reactive B  
859 Cells. *J. Exp. Med.* **197**, 845–860 (2003).

- 860 40. Smith-Gill, S. J. *et al.* Mapping the antigenic epitope for a monoclonal antibody against  
861 lysozyme. *J. Immunol. Baltim. Md 1950* **128**, 314–322 (1982).
- 862 41. Chothia, C. *et al.* The predicted structure of immunoglobulin D1.3 and its comparison  
863 with the crystal structure. *Science* **233**, 755–758 (1986).
- 864 42. Hawkins, R. E., Russell, S. J., Baier, M. & Winter, G. The Contribution of Contact and Non-  
865 contact Residues of Antibody in the Affinity of Binding to Antigen: The Interaction of  
866 Mutant D1.3 Antibodies with Lysozyme. *J. Mol. Biol.* **234**, 958–964 (1993).
- 867 43. Kieback, E., Charo, J., Sommermeyer, D., Blankenstein, T. & Uckert, W. A safeguard  
868 eliminates T cell receptor gene-modified autoreactive T cells after adoptive transfer.  
869 *Proc. Natl. Acad. Sci.* **105**, 623–628 (2008).
- 870 44. Berahovich, R. *et al.* FLAG-tagged CD19-specific CAR-T cells eliminate CD19-bearing solid  
871 tumor cells in vitro and in vivo. *Front. Biosci. Landmark Ed.* **22**, 1644–1654 (2017).
- 872 45. Schwarz, K. A., Daringer, N. M., Dolberg, T. B. & Leonard, J. N. Rewiring human cellular  
873 input-output using modular extracellular sensors. *Nat. Chem. Biol.* **13**, 202–209 (2017).
- 874 46. Chang, Z. L. & Chen, Y. Y. CARs: Synthetic Immunoreceptors for Cancer Therapy and  
875 Beyond. *Trends Mol. Med.* **23**, 430–450 (2017).
- 876 47. Wang, L. D. & Clark, M. R. B-cell antigen-receptor signalling in lymphocyte development.  
877 *Immunology* **110**, 411–420 (2003).
- 878 48. Isakov, N. Role of immunoreceptor tyrosine-based activation motif in signal transduction  
879 from antigen and Fc receptors. *Adv. Immunol.* **69**, 183–247 (1998).
- 880 49. Teh, Y.-M. & Neuberger, M. S. The Immunoglobulin (Ig) $\alpha$  and Ig $\beta$  Cytoplasmic Domains  
881 Are Independently Sufficient to Signal B Cell Maturation and Activation in Transgenic  
882 Mice. *J. Exp. Med.* **185**, 1753–1758 (1997).



- 883 50. Nojima, T. *et al.* *In-vitro* derived germinal centre B cells differentially generate memory B  
884 or plasma cells *in vivo*. *Nat. Commun.* **2**, 465 (2011).
- 885 51. Kornete, M., Marone, R. & Jeker, L. T. Highly Efficient and Versatile Plasmid-Based Gene  
886 Editing in Primary T Cells. *J. Immunol.* **200**, 2489–2501 (2018).
- 887 52. Bialk, P., Rivera-Torres, N., Strouse, B. & Kmiec, E. B. Regulation of Gene Editing Activity  
888 Directed by Single-Stranded Oligonucleotides and CRISPR/Cas9 Systems. *PLOS ONE* **10**,  
889 e0129308 (2015).
- 890 53. Richardson, C. D., Ray, G. J., DeWitt, M. A., Curie, G. L. & Corn, J. E. Enhancing homology-  
891 directed genome editing by catalytically active and inactive CRISPR-Cas9 using  
892 asymmetric donor DNA. *Nat. Biotechnol.* **34**, 339 (2016).
- 893 54. Dever, D. P. *et al.* CRISPR/Cas9  $\beta$ -globin gene targeting in human haematopoietic stem  
894 cells. *Nature* **539**, 384 (2016).
- 895 55. Gaj, T. *et al.* Targeted gene knock-in by homology-directed genome editing using Cas9  
896 ribonucleoprotein and AAV donor delivery. *Nucleic Acids Res.* **45**, e98 (2017).
- 897 56. Eyquem, J. *et al.* Targeting a CAR to the TRAC locus with CRISPR/Cas9 enhances tumour  
898 rejection. *Nature* **543**, 113–117 (2017).
- 899 57. Pulè, M. A. *et al.* A chimeric T cell antigen receptor that augments cytokine release and  
900 supports clonal expansion of primary human T cells. *Mol. Ther. J. Am. Soc. Gene Ther.*  
901 **12**, 933–941 (2005).
- 902 58. Grupp, S. A., Mitchell, R. N., Schreiber, K. L., McKean, D. J. & Abbas, A. K. Molecular  
903 mechanisms that control expression of the B lymphocyte antigen receptor complex. *J.*  
904 *Exp. Med.* **181**, 161–168 (1995).
- 905 59. Sanchez, M. *et al.* Signal transduction by immunoglobulin is mediated through Ig alpha  
906 and Ig beta. *J. Exp. Med.* **178**, 1049–1055 (1993).

- 907 60. Sather, B. D. *et al.* Efficient modification of CCR5 in primary human hematopoietic cells  
908 using a megaTAL nuclease and AAV donor template. *Sci. Transl. Med.* **7**, 307ra156  
909 (2015).
- 910 61. Roth, T. L. *et al.* Reprogramming human T cell function and specificity with non-viral  
911 genome targeting. *Nature* (2018). doi:10.1038/s41586-018-0326-5
- 912 62. Kelton, W. *et al.* Reprogramming MHC specificity by CRISPR-Cas9-assisted cassette  
913 exchange. *Sci. Rep.* **7**, (2017).
- 914 63. Barzel, A. *et al.* Promoterless gene targeting without nucleases ameliorates haemophilia  
915 B in mice. *Nature* **517**, 360–364 (2015).
- 916 64. Mierau, M. *et al.* Non-conservative homologous recombination in human B lymphocytes  
917 is promoted by activation-induced cytidine deaminase and transcription. *Nucleic Acids*  
918 *Res.* **36**, 5591–5601 (2008).
- 919  
920

921 **Acknowledgements**

922 We acknowledge the ETH Zurich D-BSSE Single Cell Unit and the ETH Zurich D-  
923 BSSE Animal Facility for support, in particular, T. Lopes, V. Jäggin, Marie-Didiée-  
924 Hussherr and Gieri Camenisch. We are grateful to Mark Pogson for providing initial  
925 scientific discussions and feedback. Funding was provided by the National  
926 Competence Center for Research on Molecular Systems Engineering.

927

928 **Author Contributions (Articles only)**

929 T.P. and S.T.R. developed methodology and designed experiments; T.P. and L.B.  
930 performed experiments; W.K., C.P., R.E. and L.C. generated critical materials and  
931 provided technical advice. T.P, L.B and S.T.R. analyzed data and wrote manuscript.

932

933 **Competing Financial Interests statement**

934 The authors declare no competing financial interests.

935
